# Supplementary material for: Daily Energy Intake Distribution and Cognitive Performance in Non-Demented Individuals
Source: MDPI journal article supplement (doi:10.3390/nu15030673), 2023-01-28
Supplement: s1 [file s1]

## Supplementary Materials:

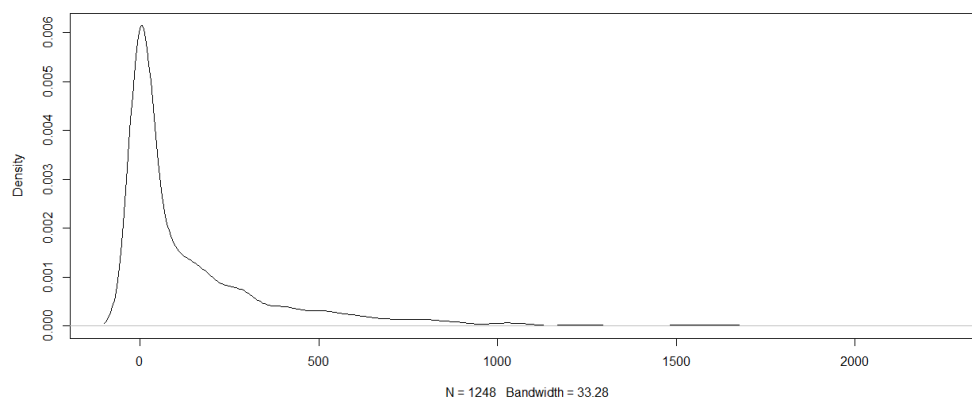

**Supplementary Figure 1.** Kernel density plot for energy intake data.

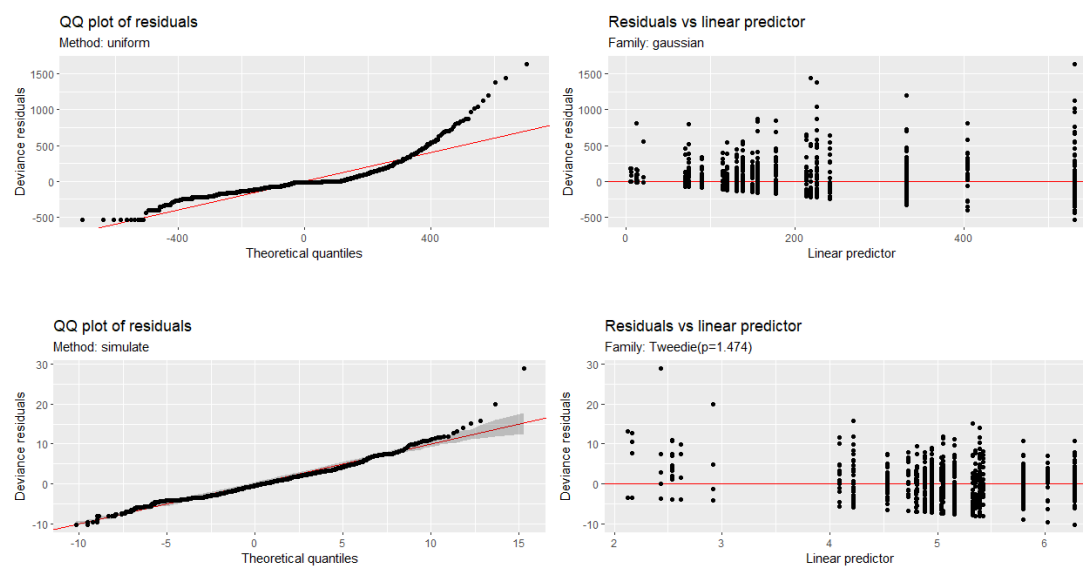

**Supplementary Figure 2:** Deviance residual plots for: A. Gaussian distribution family generalized additive model with identity link function, B. Tweedie distribution family generalized additive model with log link function.

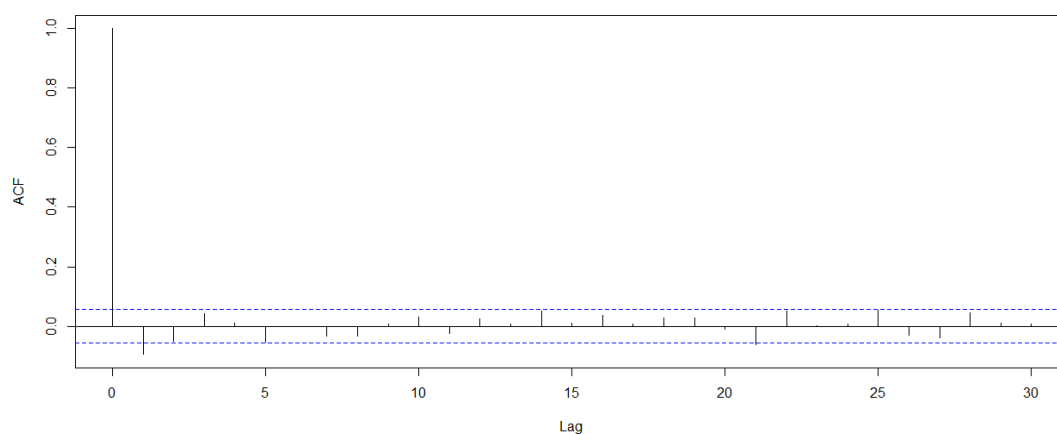

**Supplementary Figure 3:** Autocorrelation of model residuals.
